# Supplementary material
Source: PubMed Central journal article supplement (PMC2567504)
Supplement: 0806938105_0806938105SI.pdf [file 0806938105_0806938105SI.pdf]

# Supporting Information

Fourcaudot *et al.* 10.1073/pnas.0806938105

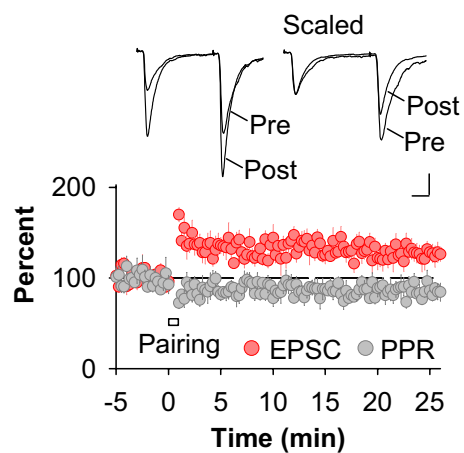

Fig. S1. Cortico-LA LTP is associated with a persistent decrease in the paired-pulse ratio (PPR) ( $n = 11$ ). (Scale bars: 50 pA and 10 ms.)

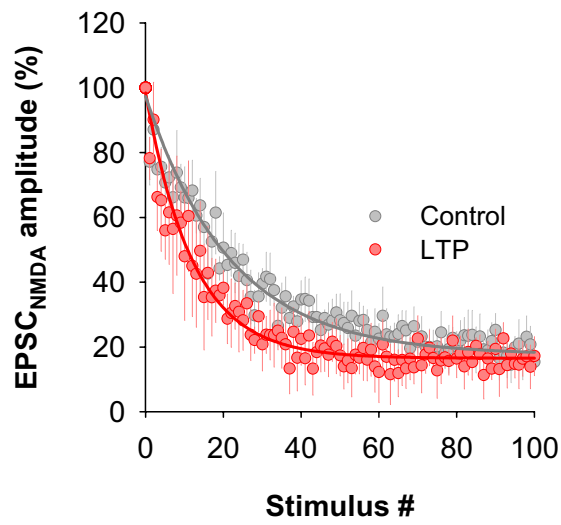

**Fig. S2.** After LTP induction, bath application of the use-dependent NMDA receptor antagonist MK-801 (40  $\mu$ M;  $n = 3$ ) results in a faster decay of NMDA receptor-mediated EPSCs compared with naïve slices ( $n = 4$ ).

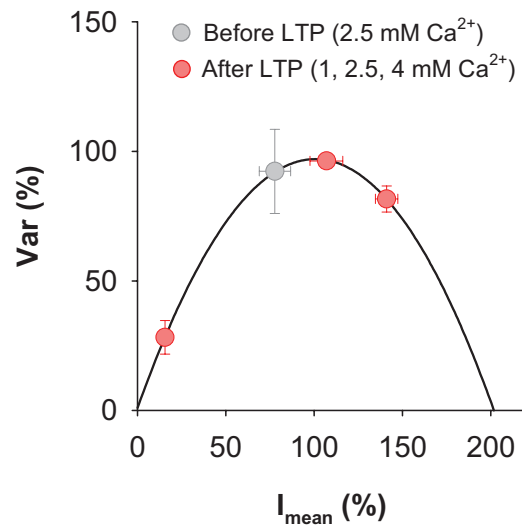

**Fig. S3.** Variance–mean analysis before and after induction of LTP<sub>HA</sub> confirms that LTP expression involves an increase in  $P$ . Averaged EPSC variances obtained from the same cells before (at 2.5 mM external  $\text{Ca}^{2+}$ ; gray symbol) and after LTP induction (at 1, 2.5, and 4 mM external  $\text{Ca}^{2+}$ ; red symbols) fall on a same parabola, revealing an increase in  $P$  after LTP induction ( $P_{\text{baseline} - 2.5 \text{ mM } \text{Ca}^{2+}} = 0.38 \pm 0.04$ ;  $P_{\text{LTP} - 2.5 \text{ mM } \text{Ca}^{2+}} = 0.53 \pm 0.05$ ;  $P_{\text{LTP} - 1 \text{ mM } \text{Ca}^{2+}} = 0.08 \pm 0.02$ ;  $P_{\text{LTP} - 4 \text{ mM } \text{Ca}^{2+}} = 0.70 \pm 0.03$ ;  $n = 6$ ;  $P < 0.05$  for all conditions). Error bars,  $\pm$ SEM.



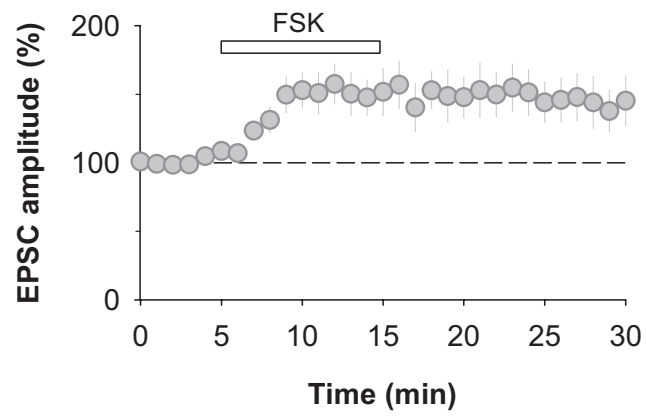

**Fig. S5.** Persistent enhancement of synaptic transmission by transient FSK application. Time course of synaptic transmission before and after a 10-min pulse application of FSK (50  $\mu$ M) reveals a potentiation of synaptic transmission that persists during washout of FSK ( $n = 9$ ). Error bars,  $\pm$ SEM.



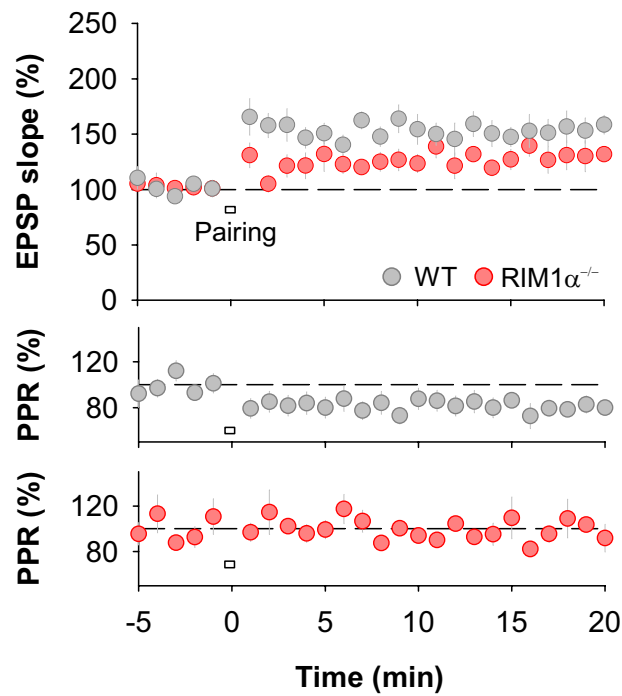

**Fig. S7.** Pairing pre- and postsynaptic activity induces postsynaptic cortico-LA LTP in *RIM1 $\alpha^{-/-}$*  mice. LTP was induced by pairing brief bursts of presynaptic stimulation (3 stimuli at 30 Hz) with postsynaptic depolarization to about  $-20$  mV (repeated five times at 15-s intervals). (*Top*) Pairing-induced cortico-LA LTP is reduced in *RIM1 $\alpha^{-/-}$*  mice compared with wild-type littermates (WT:  $154.6 \pm 11.2\%$  of baseline,  $n = 8$ ,  $P < 0.01$  vs. baseline; *RIM1 $\alpha^{-/-}$* :  $131.8 \pm 9.2\%$  of baseline,  $n = 4$ ,  $P < 0.05$  vs. baseline). (*Middle*) In wild-type littermates, pairing-induced cortico-LA LTP is associated with a persistent decrease in PPR ( $78.7 \pm 6.3\%$  of baseline,  $n = 8$ ,  $P < 0.05$ ). (*Bottom*) In *RIM1 $\alpha^{-/-}$*  mice, pairing-induced cortico-LA LTP does not alter PPR ( $104.9 \pm 3.6\%$  of baseline,  $n = 4$ , not significant). Error bars,  $\pm$ SEM.
